# Supplementary material for: Proline-catalysed asymmetric aldol reaction in the room temperature ionic liquid [bmim]PF6
Source: Royal Society of Chemistry journal article supplement (doi:10.1039/b206911c), 2002-01-01
Supplement: b206911c.doc [file b206911c.doc]

Supporting information for:

Proline-Catalyzed Asymmetric Aldol Reactions in the Room Temperature Ionic Liquid

Peter Kotrusz, Iveta Kmentová, Štefan Toma*, Battsengel Gotov, and Eva Solcaniová

Department of Organic Chemistry, Faculty of Natural Sciences, Comenius University, Mlynská dolina 842 15, Bratislava, Slovakia

[toma@fns.uniba.sk](mailto:toma@fns.uniba.sk)

**Typical experimental procedure**:

(*S*)-Proline (30 mol%) was added to pre-dried [bmim]PF6 (2 mL) and resulting mixture was stirred for 15 min. The aromatic aldehyde (1 mmol) and acetone (0.5 mL; 7 mmol) were added and the reaction mixture was stirred at room temperature under nitrogen for 24 hours. The acetone was evaporated, the residue was extracted with diethyl ether (2 mL), separated diethyl ether layer was collected and procedure was repeated until no product was detected in diethyl ether layer. The solvent was evaporated and the residue was purified by chromatography on SiO2-column (hexane:EtOAc = 3:1). All reaction products had the physical constants and NMR spectra in accord with the published data. The ionic solvent-proline system was dried at 40°C/ 1 mmHg during 2 hours and stored under nitrogen before reusing in next reaction.

Ee of the reaction product was determined by HPLC analysis (AS or AD-H) Chiralpak column, exception being entry 3 from the Table 3, where ee was determined by NMR using Eu(hfc)3 chiral shift reagent.

1H NMR spectra were recorded as solutions in CDCl3 at room temperature on a Varian Gemini 2000 spectrometer at 300 MHz for 1H NMR. Chemical shifts are given in relative to TMS ( = 0 ppm).

**4-Phenyl-4-hydroxybutan-2-one:**

1H NMR (300 MHz, CDCl3):  7.37-7.26 (m, 5H), 5.17 (m, 1H), 3.27 (d, J=3Hz, 1H), 2.85 (m, 2H), 2.20 (s, 3H).

**4-(4-trifluormethylphenyl)-4-hydroxybutan-2-one:**

1H NMR (300 MHz, CDCl3):  7.60 (d, J=7.8Hz 2H), 7.47 (d, J=8.1Hz 2H), 5.21 (t, J=6.3Hz 1H), 3.52 (bs, 1H), 2.84 (d, J=6Hz 2H), 2.21 (s, 3H)

**4-(4-fluorphenyl)-4-hydroxybutan-2-one:**

1H NMR (300 MHz, CDCl3):  7.32 (m, 2H), 7.03 (m, 2H), 5.13 (dd, J=4.8Hz, J=3Hz 1H), 3.39 (d, J=2.7Hz, 1H), 2.82 (m, 2H), 2.19 (s, 3H).

**4-(4-methoxyphenyl)-4-hydroxybutan-2-one:**

1H NMR (300 MHz, CDCl3):  7.27 (d, J=9Hz, 2H), 6.88 (d, J=8.7Hz, 2H), 5.10 (dd, J=9Hz, J=3.3Hz, 1H), 3.80 (s, 3H), 3.22 (bs, 1H), 2.84 (m, 2H), 2.19 (s, 3H).

**4-(4-nitrophenyl)-4-hydroxybutan-2-one:**

1H NMR (300 MHz, CDCl3):  8.20 (d, J=8.7Hz, 2H), 7.41 (d, J=8.4Hz, 2H), 5.26 (m, 1H), 3.61 (d, J=3Hz 1H), 2.86 (m, 2H), 2.23 (s, 3H).

**4-(4-cyanophenyl)-4-hydroxybutan-2-one:**

1H NMR (300 MHz, CDCl3):  7.65 (dd, J=8.1Hz, J=1.8Hz 2H), 7.48 (dd, J=6.3Hz, J=1.5Hz 2H), 5.21 (dt, J=1.5Hz, J=6.9Hz 1H), 3.55 (bs, 1H), 2.84 (dd, J=7.2Hz, J=1.8Hz 2H), 2.22 (s, 3H).

**4-(2-bromphenyl)-4-hydroxybutan-2-one:**

1H NMR (300 MHz, CDCl3):  7.62 (dd, J=1.5Hz, J=7.5Hz, 1H), 7.51 (dd, J=1.2Hz, J=8.1Hz, 1H), 7.35 (dt, J=1.5Hz, J=7.5Hz, 1H), 7.14 (dt, J=1.5Hz, J=7.8Hz, 1H), 5.45 (m, 1H), 3.53 (d, J=3Hz, 1H), 2.99 (dd, J=2.1Hz, J=17.7Hz, 1H), 2.66 (dd, J=9.6Hz, J=17.7Hz,1H), 2.22 (s, 3H).

**4-(2-methoxyphenyl)-4-hydroxybutan-2-one:**

1H NMR (300 MHz, CDCl3):  7.43 (d, J=7.8Hz, 1H), 7.25 (dt, J=1.5Hz, J=6.6Hz, 1H), 6.97 (t, J=7.5Hz, 1H), 6.86 (d, J=8.1Hz, 1H), 5.41 (d, J=9Hz, 1H), 3.84 (s, 3H), 3.41 (d, J=3.6Hz, 1H), 2.94 (dd, J=3.3Hz, J=17.4Hz, 1H), 2.85 (dd, J=9.3Hz, J=17.4Hz, 1H), 2.19 (s, 3H).

**4-(2-nitrophenyl)-4-hydroxybutan-2-one:**

1H NMR (300 MHz, CDCl3):  7.96 (dd, J=1.2Hz, J=8.1Hz, 1H), 7.91 (dd, J=0.9Hz, J=7.8Hz, 1H), 7.71 (dt, J=1.5Hz, J=8.1Hz, 1H), 7.44 (dt, J=1.2Hz, J=8.4Hz, 1H), 5.70 (d, J=9.3Hz, 1H), 3.71 (d, J=2.7Hz, 1H), 3.15 (dd, J=2.1Hz, J=17.7Hz, 1H), 2.70 (dd, J=9.6Hz, J=18Hz, 1H), 2.24 (s, 3H).

**4-(3-nitrophenyl)-4-hydroxybutan-2-one:**

1H NMR (300 MHz, CDCl3):  8.242 (s, 1H), 8.13 (d, J=8.7Hz, 1H), 7.72 (d, J=7.5Hz, 1H), 7.53 (t, J=7.5Hz, 1H), 5.27 (t, J=6Hz, 1H), 3.72 (bs, 1H), 2.90 (d, J=12Hz, 2H), 2.24 (s, 3H)

**4-(4-trifluormethylphenyl)-4-hydroxypentan-3-one:**

1H NMR (300 MHz, CDCl3):  7.61 (d, J=8.1Hz, 2H), 7.48 (d, J=8.1Hz, 2H), 5.23 (t, J=6.3Hz, 1H), 3.56 (bs, 1H), 2.82 (d, J=6Hz, 2H), 2.48 (q, 2H), 1.08 (t, 3H).

**4-(2-naphtyl)-4-hydroxypentan-3-one:**

1H NMR (300 MHz, CDCl3): 7.80 (m, 4H), 7.45 (m, 3H), 5.29 (d, J=8.7Hz, 1H), 3.49 (d, J=2.4Hz, 1H), 2.90 (m, 2H), 2.17 (s, 3H)

**2-[Hydroxy-(4-trifluoromethyl-phenyl)-methyl]-cyclohexanone:**

1H NMR (300 MHz, CDCl3): d, J=8.1Hz, 2H), 7.44 (d, J=8.1Hz, 2H), 4.85 (dd, J=2.7Hz, J=8.7Hz, 1H), 4.06 (d, J=3Hz, 1H), 2.45 (m, 3H), 2.02 (m, 1H), 1.64 (m, 4H), 2.34 (m, 1H)

**2-[Hydroxy-(4-trifluoromethyl-phenyl)-methyl]-cyclopentanone:**

1H NMR (300 MHz, CDCl3):  7.45 (d,7.59 (d, J=8.1Hz, 2H), J=8.1Hz, 2H), 5.35 (s, 1H), 4.75 (d, J=8.7Hz, 1H), 2.99 (s, 1H), 2.45-1,68 (m, 6H)

**2-[Hydroxy-(4-trifluoromethyl-phenyl)-methyl]-cyclobutanone:**

1H NMR (300 MHz, CDCl3): 7.63 (d, J=8.1Hz, 2H), 7.50 (d, J=8.1Hz, 2H), 4.93 (d, J=7.8Hz, 1H), 3.63 (m, 1H), 3.36 (m, 1H), 2.98 (m, 1H), 2.08 (m, 1H), 1.90 (m, 1H)
